# Supplementary material
Source: PubMed Central journal article supplement (PMC10992504)
Supplement: 262_2023_3593_MOESM1_ESM.pdf [file 262_2023_3593_MOESM1_ESM.pdf]

## Supplemental Figure 1

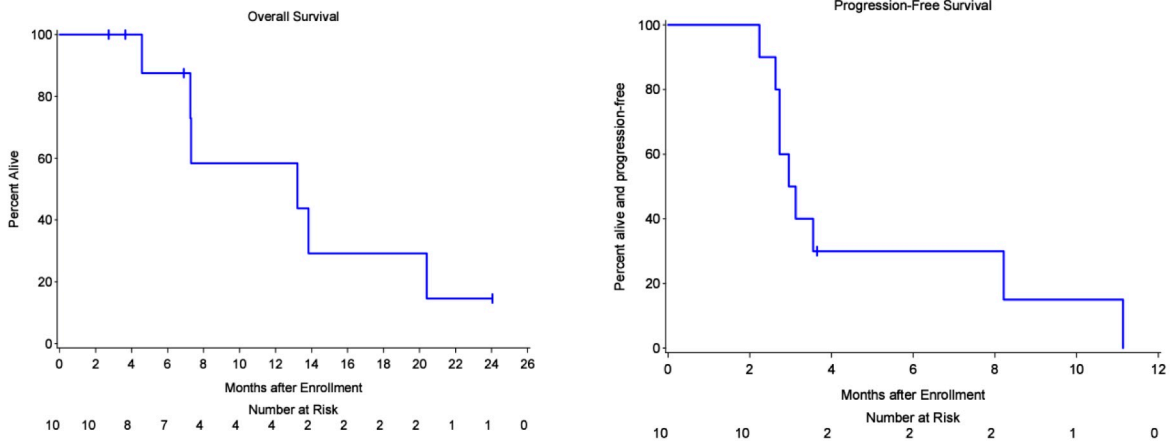

Kaplan-Meier estimates of overall and progression-free survival. Median overall survival (OS) was 13.2 months (90% CI: 7.3 – 20.4) and median progression-free survival (PFS) was 3.0 months (90% CI: 2.6-8.2)

## Supplemental Figure 2 Cell type frequencies, cellularity

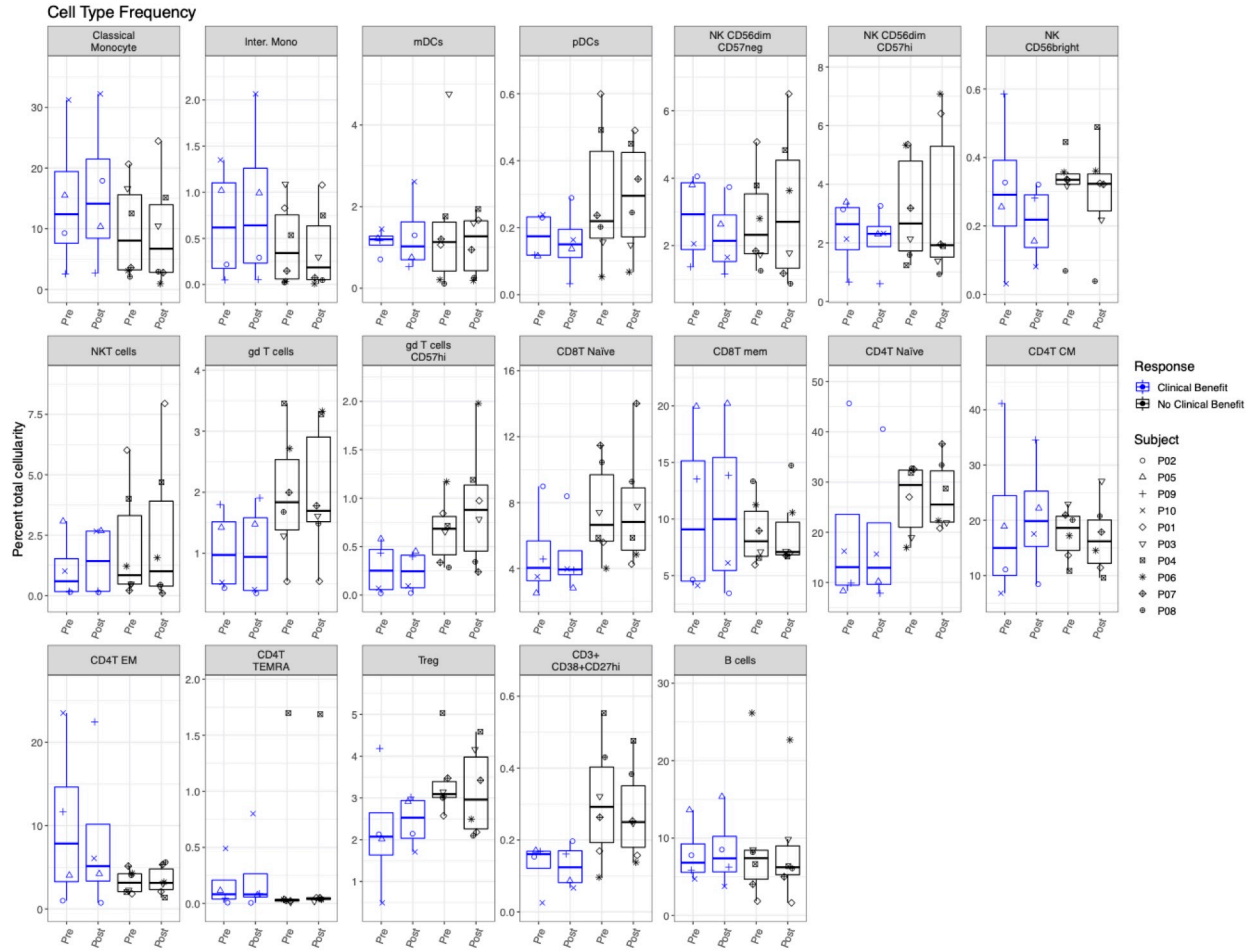

Changes in cell type frequencies of CB and NCB over the course of treatment

**Supplemental Table 1** Prior systemic therapy

| Prior Systemic Therapy | Number of Patients | No Clinical Benefit | Clinical Benefit |
|------------------------|--------------------|---------------------|------------------|
| Ipi-Nivo               | 8                  | 4                   | 4                |
| Nivo monotherapy       | 1                  | 1                   | 0                |
| Pembro monotherapy     | 1                  | 1                   | 0                |
| Ipi monotherapy        | 1                  | 1                   | 0                |
| CMP-001                | 1                  | 1                   | 0                |
| Temozolomide           | 1                  | 0                   | 1                |
| Dabrafenib/Trametinib  | 1                  | 0                   | 1                |
| Chemotherapy*          | 3                  | 1                   | 2                |

Abbreviations: Ipi, Ipilimumab; Nivo, Nivolumab; Pembro, Pembrolizumab

\*Carboplatin/Paclitaxel, Cyclophosphamide/IRX-2, Cisplatin.

**Supplemental Table 2** Treatment-related adverse events

| System-Organ Class                                   | Description                          | CTCAE Grade |      |      |     |
|------------------------------------------------------|--------------------------------------|-------------|------|------|-----|
|                                                      |                                      | 1           | 2    | 3    | 4   |
|                                                      |                                      | n=105       | n=52 | n=18 | n=2 |
| Blood and lymphatic system disorders                 | Anemia                               | 2           | -    | -    | -   |
|                                                      | Eosinophilia                         | 1           | -    | -    | -   |
|                                                      | Leukocytosis                         | -           | -    | 1    | -   |
| Endocrine disorders                                  | Hypothyroidism                       | -           | 1    | -    | -   |
| Eye disorders                                        | Decreased Close Visual Acuity        | 1           | -    | -    | -   |
|                                                      | Dry Eye                              | 1           | -    | -    | -   |
|                                                      | Eye Pain                             | 1           | -    | -    | -   |
| Gastrointestinal disorders                           | Abdominal Pain                       | -           | 1    | 1    | -   |
|                                                      | Constipation                         | 2           | -    | -    | -   |
|                                                      | Diarrhea                             | 4           | -    | -    | -   |
|                                                      | Dry Mouth                            | 2           | -    | -    | -   |
|                                                      | Dyspepsia                            | -           | 1    | -    | -   |
|                                                      | Dysphagia                            | 1           | -    | -    | -   |
|                                                      | Gastrointestinal Pain                | 1           | -    | -    | -   |
|                                                      | Hemorrhoids                          | 1           | -    | -    | -   |
|                                                      | Mucositis Oral                       | -           | 1    | -    | -   |
|                                                      | Nausea                               | 2           | 1    | -    | -   |
|                                                      | Oral Dysesthesia                     | 1           | -    | -    | -   |
|                                                      | Rectal Hemorrhage                    | 1           | -    | -    | -   |
|                                                      | Vomiting                             | 2           | 1    | 1    | -   |
| General disorders and administration site conditions | Chills                               | 1           | -    | -    | -   |
|                                                      | Edema Limbs                          | 2           | -    | -    | -   |
|                                                      | Fatigue                              | 3           | 3    | 1    | -   |
|                                                      | Fever                                | -           | -    | 1    | -   |
|                                                      | Flu Like Symptoms                    | 1           | -    | -    | -   |
|                                                      | Infusion Related Reaction            | 1           | -    | -    | -   |
| Infections and infestations                          | Pain                                 | 1           | -    | -    | -   |
|                                                      | Encephalitis Infection               | -           | -    | -    | 1   |
|                                                      | Lung Infection                       | -           | -    | 1    | -   |
|                                                      | Primary Tumor- Oropharynx            | -           | -    | 1    | -   |
|                                                      | Sinusitis                            | -           | 1    | -    | -   |
| Injury, poisoning, and procedural complications      | Urinary Tract Infection              | -           | 1    | -    | -   |
|                                                      | Fall                                 | 1           | -    | -    | -   |
| Investigations                                       | Hernia                               | -           | 1    | -    | -   |
|                                                      | Alanine Aminotransferase Increased   | 4           | -    | -    | -   |
|                                                      | Alkaline Phosphatase Increased       | 1           | -    | -    | -   |
|                                                      | Aspartate Aminotransferase Increased | 3           | 1    | -    | -   |
|                                                      | Blood Bilirubin Increased            | 1           | -    | -    | -   |



|                                                                      |                                       |   |   |   |   |
|----------------------------------------------------------------------|---------------------------------------|---|---|---|---|
|                                                                      | Blood Lactate Dehydrogenase Increased | 1 | - | - | - |
|                                                                      | Creatinine Increased                  | 3 | - | - | - |
|                                                                      | Increased Bun                         | 1 | - | - | - |
|                                                                      | INR Increased                         | - | 1 | - | - |
|                                                                      | Lipase Increased                      | 2 | 1 | - | - |
|                                                                      | Lymphocyte Count Decreased            | 1 | 3 | - | - |
|                                                                      | Neutrophil Count Decreased            | 2 | - | - | - |
|                                                                      | Platelet Count Decreased              | 2 | - | - | - |
|                                                                      | Platelet Count Increased              | 1 | - | - | - |
|                                                                      | Serum Amylase Increased               | 1 | 1 | - | - |
|                                                                      | Weight Loss                           | 3 | - | - | - |
| Metabolism and nutrition disorders                                   | Anorexia                              | - | 3 | - | - |
|                                                                      | Dehydration                           | - | 1 | - | - |
|                                                                      | Glucose Intolerance                   | 1 | - | - | - |
|                                                                      | Hyperkalemia                          | 2 | - | - | - |
|                                                                      | Hypoalbuminemia                       | - | 3 | - | - |
|                                                                      | Hypocalcemia                          | - | 1 | - | - |
|                                                                      | Hypokalemia                           | 1 | - | - | - |
|                                                                      | Hyponatremia                          | 5 | - | - | - |
|                                                                      | Hypophosphatemia                      | 1 | 2 | - | - |
| Musculoskeletal and connective tissue disorders                      | Hypoproteinemia                       | 1 | - | - | - |
|                                                                      | Arthralgia                            | 2 | 2 | - | - |
|                                                                      | Arthritis                             | 1 | - | - | - |
|                                                                      | Avascular Necrosis                    | - | 1 | - | - |
|                                                                      | Back Pain                             | 1 | - | - | - |
|                                                                      | Flank Pain                            | - | - | 1 | - |
|                                                                      | Generalized Muscle Weakness           | 1 | - | - | - |
|                                                                      | Left Chest Wall Pain                  | - | 1 | - | - |
| Neoplasms benign, malignant, and unspecified (incl cysts and polyps) | Neck Pain                             | 1 | - | 2 | - |
|                                                                      | Pain in Extremity                     | 2 | - | - | - |
| Nervous system disorders                                             | Tumor Pain                            | 1 | - | - | - |
|                                                                      | Dizziness                             | 2 | - | - | - |
|                                                                      | Dysesthesia                           | - | 1 | - | - |
|                                                                      | Headache                              | 2 | 4 | 2 | - |
| Psychiatric disorders                                                | Paresthesia                           | - | 1 | - | - |
|                                                                      | Confusion                             | 1 | - | - | - |
| Renal and urinary disorders                                          | Insomnia                              | 1 | 1 | - | - |
|                                                                      | Hematuria                             | 3 | - | - | - |
|                                                                      | Proteinuria                           | 2 | 4 | - | - |
| Respiratory, thoracic and mediastinal disorders                      | Allergic Rhinitis                     | - | 1 | - | - |
|                                                                      | Cough                                 | 2 | - | - | - |
|                                                                      | Dyspnea                               | 1 | 1 | - | - |
|                                                                      | Epistaxis                             | 1 | - | - | - |
|                                                                      | Hoarseness                            | 1 | - | - | - |
|                                                                      | Nasal Congestion                      | 1 | - | - | - |

|                                        |                      |   |   |   |   |
|----------------------------------------|----------------------|---|---|---|---|
|                                        | Pulmonary Edema      | - | 1 | - | - |
|                                        | Rhinorrhea           | 1 | - | - | - |
|                                        | Sore Throat          | 1 | - | - | - |
| Skin and subcutaneous tissue disorders | Alopecia             | 1 | - | - | - |
|                                        | Eczema- Right Palm   | 1 | - | - | - |
|                                        | Photosensitivity     | 1 | - | - | - |
|                                        | Pruritus             | 3 | - | - | - |
|                                        | Psoriasis            | - | 1 | - | - |
|                                        | Rash                 | 1 | - | - | - |
|                                        | Rash Maculo-Papular  | - | 1 | - | - |
| Vascular disorders                     | Hypertension         | - | 2 | 6 | 1 |
|                                        | Thromboembolic Event | - | 1 | - | - |

Abbreviations: CTCAE, common terminology criteria for adverse events

**Supplemental Table 3** Cytokine measurements values

| Analyte pg/mL | Clinical benefit            | Non-clinical benefit    | p-value |
|---------------|-----------------------------|-------------------------|---------|
| IL-1b         | 91.4 (1.0 – 679.9)          | 89.6 (1.0 – 566.7)      | 0.97    |
| IL-3          | 889.8 (5.1 – 3909.6)        | 142.2 (1.0 – 1210.2)    | 0.61    |
| IL-4          | 215.6 (10.6 – 668.0)        | 90.6 (19.6 – 467.4)     | 0.91    |
| IL-5          | 9.4 (1.0 – 31.8)            | 6.3 (1.0 – 28.3)        | 0.81    |
| IL-6          | 8.6 (2.2 – 24.7)            | 7.1 (1.1 – 16.7)        | 0.61    |
| IL-7          | 24.7 (1.6 – 115.1)          | 10.0 (3.2 – 64.8)       | 0.99    |
| IL-10         | 7.1 (1.0 – 22.5)            | 3.7 (1.0 – 13.5)        | 0.99    |
| IL-12p70      | 1023.5 (30.5 – 3563.8)      | 308.6 (9.1 – 2694.0)    | 0.91    |
| IL-13         | 38038.0 (27648.0 – 57338.0) | 36280.0 (1.0 – 53411.0) | 0.91    |
| CXCL10        | 109.4 (71.9 – 258.8)        | 128.4 (97.6 – 470.4)    | 0.35    |
| FGFb          | 35.4 (1.1 – 120.0)          | 5.2 (0.3 – 58.4)        | 0.76    |
| Flt-3 ligand  | 303.3 (83.0 – 647.7)        | 170.4 (60.6 – 223.5)    | 0.48    |
| HGF           | 273.2 (55.7 – 364.4)        | 187.1 (91.6 – 953.5)    | 0.91    |
| PD-L1         | 55.1 (28.3 – 107.1)         | 63.5 (30.1 – 84.3)      | 0.76    |
| PDGF-AB       | 1637.5 (936.1 – 4138.6)     | 1097.7 (489.3 – 1905.5) | 0.27    |
| TGFa          | 199.2 (1.6 – 432.1)         | 57 (6.7 – 164.2)        | 0.91    |
| TNFa          | 64.4 (1.0 – 347.1)          | 32.5 (2.0 – 241.8)      | 0.99    |
| TNFb          | 120.2 (1.0 – 555.8)         | 29.0 (1.0 – 335.3)      | 0.97    |
| VEGFa         | 113.5 (29.1 – 418.6)        | 86.0 (27.8 – 318.0)     | 0.99    |

All data are presented in median (range) pg/mL.

**Supplemental Table 4** Mass cytometry antibody panel

| Metal | Marker             | Clone    |
|-------|--------------------|----------|
| 142Nd | CD19               | HIB19    |
| 143Nd | CD45RA             | HI100    |
| 144Nd | CD69               | FN50     |
| 145Nd | CD4                | RPA-T4   |
| 146Nd | CD8a               | RPA-T8   |
| 147Sm | CD11c              | Bu15     |
| 148Nd | ICOS               | C398.4A  |
| 149Sm | CD56               | NCAM16.2 |
| 150Nd | LAG3               | 11C3C65  |
| 151Eu | CD123              | 6H6      |
| 152Sm | TCR $\gamma\delta$ | 11F2     |
| 153Eu | CXCR5              | RF8B2    |
| 154Sm | CD3                | UCHT1    |
| 155Gd | CD27               | L128     |
| 156Gd | CD14               | HCD14    |
| 158Gd | CD33               | WM53     |
| 159Tb | TIGIT              | MBSA43   |
| 160Gd | MIP1b              | D21-1351 |
| 161Dy | Tbet               | 4B10     |
| 162Dy | FoxP3              | 259D/C7  |
| 163Dy | CD57               | HCD57    |
| 164Dy | IL-17a             | N49-653  |
| 165Ho | IFNg               | B27      |
| 166Er | NKG2D              | ON72     |
| 167Er | CCR7               | G043H7   |
| 168Er | Ki-67              | B56      |
| 169Tm | CD25               | 2A3      |
| 170Er | CTLA-4             | 14D3     |
| 171Yb | CCR5               | NP6G4    |
| 172Yb | CD38               | HIT2     |
| 173Yb | HLA-DR             | L243     |
| 174Yb | PD-1               | EH12.2H7 |
| 175Lu | CCR4               | L291H4   |
| 176Yb | CD127              | A019D5   |
| 209Bi | CD16               | 3G8      |

## **Key Resources Table**

| REAGENT or RESOURCE                                          | SOURCE   | IDENTIFIER   |
|--------------------------------------------------------------|----------|--------------|
| Antibodies                                                   |          |              |
| Anti-Human CD19 (HIB19)-142Nd—100 Tests (1:100)              | Fluidigm | Cat#3142001B |
| Anti-Human CD45RA (HI100)-143Nd—100 Tests (1:100)            | Fluidigm | Cat#3143006B |
| Anti-Human CD69 (FN50)-144Nd—100 Tests (1:100)               | Fluidigm | Cat#3144018B |
| Anti-Human CD4 (RPA-T4)-145Nd—100 Tests (1:100)              | Fluidigm | Cat#3145001B |
| Anti-Human CD8 (RPA-T8)-146Nd—100 Tests (1:100)              | Fluidigm | Cat#3146001B |
| Anti-Human CD11c (Bu15)-147Sm—100 Tests (1:100)              | Fluidigm | Cat#3147008B |
| Anti-CD278/ICOS (C398.4A)-148Nd—100 Tests (1:100)            | Fluidigm | Cat#3148019B |
| Anti-Human CD56/NCAM (NCAM16.2)-149Sm—100 Tests (1:100)      | Fluidigm | Cat#3149021B |
| Anti-Human CD223/LAG-3 (11C3C65)-150Nd—100 Tests (1:100)     | Fluidigm | Cat#3150030B |
| Anti-Human CD123/IL-3R (6H6)-151Eu—100 Tests (1:100)         | Fluidigm | Cat#3151001B |
| Anti-Human TCRgd (11F2)-152Sm—100 Tests (1:100)              | Fluidigm | Cat#3152008B |
| Anti-Human CD185/CXCR5 (RF8B2)-153Eu—100 Tests (1:100)       | Fluidigm | Cat#3153020B |
| Anti-Human CD3 (UCHT1)-154Sm—100 Tests (1:200)               | Fluidigm | Cat#3154003B |
| Anti-Human CD27 (L128)-155Gd—100 Tests (1:100)               | Fluidigm | Cat#3155001B |
| Anti-Human CD14 (HCD14)-156Gd—100 Tests (1:100)              | Fluidigm | Cat#3156019B |
| Anti-Human CD33 (WM53)-158Gd—100 Tests (1:100)               | Fluidigm | Cat#3158001B |
| Anti-Human TIGIT (MBSA43)-159Tb—100 Tests (1:100)            | Fluidigm | Cat#3159038B |
| Anti-Human/Mouse MIP1beta (D21-1351)-160Gd—100 Tests (1:100) | Fluidigm | Cat#3160013B |
| Anti-Human/Mouse Tbet (4B10)-161Dy—100 Tests (1:100)         | Fluidigm | Cat#3161014B |
| Anti-Human FoxP3 (259D/C7)-162Dy—50 Tests (1:100)            | Fluidigm | Cat#3162024A |
| Anti-Human CD57 (HCD57)-163Dy—100 Tests (1:200)              | Fluidigm | Cat#3163022B |
| Anti-Human IL-17A (N49-653)-164Dy—100 Tests (1:100)          | Fluidigm | Cat#3164002B |

|                                                                           |                          |                  |
|---------------------------------------------------------------------------|--------------------------|------------------|
| Anti-Human IFN $\gamma$ (B27)-165Ho—100 Tests (1:100)                     | Fluidigm                 | Cat#3165002B     |
| Anti-Human CD314/NKG2D (ON72)-166Er—100 Tests (1:100)                     | Fluidigm                 | Cat#3166016B     |
| Anti-Human CD197/CCR7 (G043H7)-167Er—50 Tests (1:100)                     | Fluidigm                 | Cat#3167009A     |
| Anti-Ki-67 (B56)-168Er—100 Tests (1:100)                                  | Fluidigm                 | Cat#3168007B     |
| Anti-Human CD25 (2A3)-169Tm—100 Tests (1:100)                             | Fluidigm                 | Cat#3169003B     |
| Anti-Human CD152/CTLA-4 (14D3)-170Er—100 Tests (1:100)                    | Fluidigm                 | Cat#3170005B     |
| Anti-Human CD195/CCR5 (NP-6G4)-171Yb—50 Tests (1:50)                      | Fluidigm                 | Cat#3171017A     |
| Anti-Human CD38 (HIT2)-172Yb—100 Tests (1:100)                            | Fluidigm                 | Cat#3172007B     |
| Anti-Human HLA-DR (L243)-173Yb—100 Tests (1:200)                          | Fluidigm                 | Cat#3173005B     |
| Anti-Human CD279/PD-1 (EH12.2H7)-174Yb—100 Tests (1:100)                  | Fluidigm                 | Cat#3174020B     |
| Anti-Human CD194/CCR4 (L291H4)-175Lu—50 Tests (1:50)                      | Fluidigm                 | Cat#3175035A     |
| Anti-Human CD127/IL-7Ra (A019D5)-176Yb—100 Tests (1:100)                  | Fluidigm                 | Cat#3176004B     |
| Anti-Human CD16 (3G8)-209Bi—100 Tests (1:100)                             | Fluidigm                 | Cat#3209002B     |
| Chemicals, peptides, and recombinant proteins                             |                          |                  |
| Ficoll-Paque™ Plus                                                        | Sigma-Aldrich            | Cat#17144003     |
| Dimethyl Sulfoxide (DMSO)                                                 | Fisher BioReagents       | Cat#BP231-100    |
| Gibco™ Phosphate-Buffered Saline (PBS)                                    | Thermo Fisher Scientific | Cat#10010023     |
| Antibiotic-Antimycotic (100 $\times$ )                                    | Gibco                    | Cat#15240096     |
| Bovine Serum Albumin (BSA), 30% $\pm$ 2% in 0.85% NaCl                    | Sigma-Aldrich            | Cat#A7284        |
| Sodium Azide, 10% (w/v) solution in Ultra-Pure H <sub>2</sub> O           | Teknova                  | Cat#S0209        |
| RPMI Medium 1640 [+]<br>L-glutamine                                       | Thermo Fisher Scientific | Cat#11875093     |
| Gibco™ Premium Plus Fetal Bovine Serum, heat inactivated, qualified (FBS) | Thermo Fisher Scientific | Cat#10438026     |
| UltraPure™ DNase/RNase-Free Distilled Water                               | Invitrogen               | Cat#10977023     |
| ViaStain™ AOPI Staining Solution                                          | Nexcelom Biosciences     | Cat#CS2-0106-5mL |
| Cell-ID™ Intercalator-103Rh—500 $\mu$ M                                   | Fluidigm                 | Cat#201103A      |
| Cell-ID™ Intercalator-191/193Ir—125 $\mu$ M                               | Fluidigm                 | Cat#201192B      |
| Maxpar® Cell Acquisition Solution                                         | Fluidigm                 | Cat#201237       |

|                                                                                         |                            |                                |
|-----------------------------------------------------------------------------------------|----------------------------|--------------------------------|
| Maxpar® Cell Staining Buffer                                                            | Fluidigm                   | Cat#201068                     |
| Maxpar® 10× Barcode Perm Buffer                                                         | Fluidigm                   | Cat#201057                     |
| EQ™ Four Element Calibration Beads                                                      | Fluidigm                   | Cat#201078                     |
| eBioscience™ Permeabilization Buffer (10×)                                              | Invitrogen                 | Cat#00833356                   |
| eBioscience™ Fixation/Permeabilization Concentrate                                      | Invitrogen                 | Cat#00512343                   |
| eBioscience™ Fixation/Permeabilization Diluent                                          | Invitrogen                 | Cat#00522356                   |
| Human TruStain FcX™ (FcR Blocking Solution)                                             | BioLegend                  | Cat#422302                     |
| Pierce™ 16% Formaldehyde Solution (w/v), Methanol-free                                  | Thermo Fisher Scientific   | Cat#28906                      |
| CyTOF® Tuning Solution, 250 mL                                                          | Fluidigm                   | Cat#201072                     |
| Critical commercial assays                                                              |                            |                                |
| Cell-ID™ 20-Plex Pd Barcoding Kit                                                       | Fluidigm                   | Cat#201060                     |
| Biological samples                                                                      |                            |                                |
| Human PBMCs isolated from whole blood clinical samples (sex, age as required par study) | Any Supplier               | N/A                            |
| Software and algorithms                                                                 |                            |                                |
| FlowJo v.10                                                                             | Becton Dickinson & Company | <a href="#">FlowJo</a>         |
| GraphPad Prism v9.2                                                                     | GraphPad Software, LLC     | <a href="#">GraphPad Prism</a> |
| CyTOF Software v7.0.8493                                                                | Fluidigm                   | <a href="#">CyTOF Software</a> |
| Other                                                                                   |                            |                                |
| CoolCell™ LX Cell Freezing Vial Containers                                              | Corning Inc.               | Cat#07210001                   |
| 15 mL Polypropylene Centrifuge Tubes                                                    | Corning Inc.               | Cat#430052                     |
| 50 mL Polypropylene Centrifuge Tubes                                                    | Corning Inc.               | Cat#430829                     |
| Cellometer® SD100 Cell Counting Chamber Slides                                          | Nexcelom Biosciences       | CHT4-SD100-014                 |
| 70 µm Cell Strainer, Polypropylene Frame                                                | Biologix                   | Cat#15-1070                    |
| Eppendorf® 1.5 mL Safe-Lock Microcentrifuge Tubes, natural                              | Eppendorf                  | Cat#022363204                  |
| 96-well Polystyrene V-Bottom Plate, untreated                                           | Corning Inc.               | Cat#3896                       |
| Polystyrene 96-well Microplate Corner Notch Lid                                         | Corning Inc.               | Cat#3930                       |
| Falcon® 5 mL Round Bottom Polypropylene Tubes (FACS tubes)                              | Corning Inc.               | Cat#352063                     |
| Falcon® 5 mL Round Bottom Polystyrene Tubes with 35 µm Cell Strainer Snap Caps          | Corning Inc.               | Cat#352235                     |
| ThermoFisher Scientific™ Sorvall™ Legend™ XTR Refrigerated Centrifuge, 120VAC           | Thermo Fisher Scientific   | Cat#75004521                   |

|                                                                      |                          |                |
|----------------------------------------------------------------------|--------------------------|----------------|
| Fisherbrand™ Mini-Centrifuge 100–240 V, 50/6-Hz Universal Plug, Grey | Thermo Fisher Scientific | Cat#12-006-901 |
| Fisher Scientific Digital Vortex Mixer                               | Thermo Fisher Scientific | Cat#0215370    |
| Thermo Scientific™ Precision™ Circulating Water Bath                 | Thermo Fisher Scientific | Cat#TSCIR19    |
| Cellometer® Auto 2000 Cell Viability Counter                         | Nexcelom Biosciences     | Auto 2000      |
| Fluidigm Helios™ Mass Cytometer                                      | Fluidigm                 | N/A            |
| Nebulizer for Helios™ Mass Cytometer                                 | Fluidigm                 | Cat#107144     |
| WB Injector for Helios™ Mass Cytometer                               | Fluidigm                 | Cat#107950     |

#### Complete RPMI

| Reagent                       | Final concentration | Amount |
|-------------------------------|---------------------|--------|
| RPMI Medium 1640 (1×)         | n/a                 | 500 mL |
| FBS                           | 10%                 | 50 mL  |
| Antibiotic-Antimycotic (100×) | 1%                  | 5 mL   |
| Total                         | n/a                 | 555 mL |

Store at 4°C for up to 2 weeks.

#### CyFACS

| Reagent         | Final concentration | Amount   |
|-----------------|---------------------|----------|
| PBS             | n/a                 | 500 mL   |
| 30% BSA         | 0.5%                | 8.3 mL   |
| 5% Sodium Azide | 0.02%               | 2 mL     |
| Total           | n/a                 | 510.3 mL |

Store at 4°C for up to 6 weeks.

#### FoxP3 Fixation/Permeabilization Buffer

| Reagent                               | Final concentration | Amount |
|---------------------------------------|---------------------|--------|
| Fixation/Permeabilization Concentrate | 25%                 | 8 mL   |
| Fixation/Permeabilization Diluent     | 75%                 | 32 mL  |
| Total                                 | n/a                 | 40 mL  |
